# Supplementary material for: The First Transcriptome Assembly of Yenyuan Stream Salamander (Batrachuperus yenyuanensis) Provides Novel Insights into Its Molecular Evolution
Source: MDPI journal article supplement (doi:10.3390/ijms20071529), 2019-03-27

| conservation | <div><div></div><div></div><div></div><div></div><div></div><div></div><div></div><div></div><div></div><div></div><div></div><div></div><div></div><div></div><div></div><div></div><div></div><div></div><div></div><div></div><div></div><div></div><div></div><div></div><div></div><div></div><div></div><div></div><div></div><div></div><div></div><div></div><div></div><div></div><div></div><div></div><div></div><div></div><div></div><div></div><div></div><div></div><div></div><div></div><div></div><div></div><div></div><div></div><div></div><div></div><div></div><div></div><div></div><div></div><div></div><div></div><div></div><div></div><div></div><div></div><div></div><div></div><div></div><div></div><div></div><div></div><div></div><div></div><div></div><div></div><div></div><div></div><div></div><div></div><div></div><div></div><div></div><div></div><div></div><div></div><div></div><div></div><div></div><div></div><div></div><div></div><div></div><div></div><div></div><div></div><div></div><div></div><div></div><div></div><div></div><div></div><div></div><div></div><div></div><div></div><div></div><div></div><div></div><div></div><div></div><div></div><div></div><div></div><div></div><div></div><div></div><div></div><div></div><div></div><div></div><div></div><div></div><div></div><div></div><div></div><div></div><div></div><div></div><div></div><div></div><div></div><div></div><div></div><div></div><div></div><div></div><div></div><div></div><div></div><div></div><div></div><div></div><div></div><div></div><div></div><div></div><div></div><div></div><div></div><div></div><div></div><div></div><div></div><div></div><div></div><div></div><div></div><div></div><div></div><div></div><div></div><div></div><div></div><div></div><div></div><div></div><div></div><div></div><div></div><div></div><div></div><div></div><div></div><div></div><div></div><div></div><div></div><div></div><div></div><div></div><div></div><div></div><div></div><div></div><div></div><div></div><div></div><div></div><div></div><div></div><div></div><div></div><div></div><div></div><div></div><div></div><div></div><div></div><div></div><div></div><div></div><div></div><div></div><div></div><div></div><div></div><div></div><div></div><div></div><div></div><div></div><div></div><div></div><div></div><div></div><div></div><div></div><div></div><div></div><div></div><div></div><div></div><div></div><div></div><div></div><div></div><div></div><div></div><div></div><div></div><div></div><div></div><div></div><div></div><div></div><div></div><div></div><div></div><div></div><div></div><div></div><div></div><div></div><div></div><div></div><div></div><div></div><div></div><div></div><div></div><div></div><div></div><div></div><div></div><div></div><div></div><div></div><div></div><div></div><div></div><div></div><div></div><div></div><div></div><div></div><div></div><div></div><div></div><div></div><div></div><div></div><div></div><div></div><div></div><div></div><div></div><div></div><div></div><div></div><div></div><div></div><div></div><div></div><div></div><div></div><div></div><div></div><div></div><div></div><div></div><div></div><div></div><div></div><div></div><div></div><div></div><div></div><div></div><div></div><div></div><div></div><div></div><div></div><div></div><div></div><div></div><div></div><div></div><div></div><div></div><div></div><div></div><div></div><div></div><div></div><div></div><div></div><div></div><div></div><div></div><div></div><div></div><div></div><div></div><div></div><div></div><div></div><div></div><div></div><div></div><div></div><div></div><div></div><div></div><div></div><div></div><div></div><div></div><div></div><div></div><div></div><div></div><div></div><div></div><div></div><div></div><div></div><div></div><div></div><div></div><div></div><div></div><div></div><div></div><div></div><div></div><div></div><div></div><div></div><div></div><div></div><div></div><div></div><div></div><div></div><div></div><div></div><div></div><div></div><div></div><div></div><div></div><div></div><div></div><div></div><div></div><div></div><div></div><div></div><div></div><div></div><div></div><div></div><div></div><div></div><div></div><div></div><div></div><div></div><div></div><div></div><div></div><div></div><div></div><div></div><div></div><div></div><div></div><div></div><div></div><div></div><div></div><div></div><div></div><div></div><div></div><div></div><div></div><div></div><div></div><div></div><div></div><div></div><div></div><div></div><div></div><div></div><div></div><div></div><div></div><div></div><div></div><div></div><div></div><div></div><div></div><div></div><div></div><div></div><div></div><div></div><div></div><div></div><div></div><div></div><div></div><div></div><div></div><div></div><div></div><div></div><div></div><div></div><div></div><div></div><div></div><div></div><div></div><div></div><div></div><div></div><div></div><div></div><div></div><div></div><div></div><div></div><div></div><div></div><div></div><div></div><div></div><div></div><div></div><div></div><div></div><div></div><div></div><div></div><div></div><div></div><div></div><div></div><div></div><div></div><div></div><div></div><div></div><div></div><div></div><div></div><div></div><div></div><div></div><div></div><div></div><div></div><div></div><div></div><div></div><div></div><div></div><div></div><div></div><div></div><div></div><div></div><div></div><div></div><div></div><div></div><div></div><div></div><div></div><div></div><div></div><div></div><div></div><div></div><div></div><div></div><div></div><div></div><div></div><div></div><div></div><div></div><div></div><div></div><div></div><div></div><div></div><div></div><div></div><div></div><div></div><div></div><div></div><div></div><div></div><div></div><div></div><div></div><div></div><div></div><div></div><div></div><div></div><div></div><div></div><div></div><div></div><div></div><div></div><div></div><div></div><div></div><div></div><div></div><div></div><div></div><div></div><div></div><div></div><div></div><div></div><div></div><div></div><div></div><div></div><div></div><div></div><div></div><div></div><div></div><div></div><div></div><div></div><div></div><div></div><div></div><div></div><div></div><div></div><div></div><div></div><div></div><div></div><div></div><div></div><div></div><div></div><div></div><div></div><div></div><div></div><div></div><div></div><div></div><div></div><div></div><div></div><div></div><div></div><div></div><div></div><div></div><div></div><div></div><div></div><div></div><div></div><div></div><div></div><div></div><div></div><div></div><div></div><div></div><div></div><div></div><div></div><div></div><div></div><div></div><div></div><div></div><div></div><div></div><div></div><div></div><div></div><div></div><div></div><div></div><div></div><div></div><div></div><div></div><div></div><div></div><div></div><div></div><div></div><div></div><div></div><div></div><div></div><div></div><div></div><div></div><div></div><div></div><div></div><div></div><div></div><div></div><div></div><div></div><div></div><div></div><div></div><div></div><div></div><div></div><div></div><div></div><div></div><div></div><div></div><div></div><div></div><div></div><div></div><div></div><div></div><div></div><div></div><div></div><div></div><div></div><div></div><div></div><div></div><div></div><div></div><div></div><div></div><div></div><div></div><div></div><div></div><div></div><div></div><div></div><div></div><div></div><div></div><div></div><div></div><div></div><div></div><div></div><div></div><div></div><div></div><div></div><div></div><div></div><div></div><div></div><div></div><div></div><div></div><div></div><div></div><div></div><div></div><div></div><div></div><div></div><div></div><div></div><div></div><div></div><div></div><div></div><div></div><div></div><div></div><div></div><div></div><div></div><div></div><div></div><div></div><div></div><div></div><div></div><div></div><div></div><div></div><div></div><div></div><div></div><div></div><div></div><div></div><div></div><div></div><div></div><div></div><div></div><div></div><div></div><div></div><div></div><div></div><div></div><div></div><div></div><div></div><div></div><div></div><div></div><div></div><div></div><div></div><div></div><div></div><div></div><div></div><div></div><div></div><div></div><div></div><div></div><div></div><div></div><div></div><div></div><div></div><div></div><div></div><div></div><div></div><div></div><div></div><div></div><div></div><div></div><div></div><div></div><div></div><div></div><div></div><div></div><div></div><div></div><div></div><div></div><div></div><div></div><div></div><div></div><div></div><div></div><div></div><div></div><div></div><div></div><div></div><div></div><div></div><div></div><div></div><div></div><div></div><div></div><div></div><div></div><div></div><div></div><div></div><div></div><div></div><div></div><div></div><div></div><div></div><div></div><div></div><div></div><div></div><div></div><div></div><div></div><div></div><div></div><div></div><div></div><div></div><div></div><div></div><div></div><div></div><div></div><div></div><div></div><div></div><div></div><div></div><div></div><div></div><div></div><div></div><div></div><div></div><div></div><div></div><div></div><div></div><div></div><div></div><div></div><div></div><div></div><div></div><div></div><div></div><div></div><div></div><div></div><div></div><div></div><div></div><div></div><div></div><div></div><div></div><div></div><div></div><div></div><div></div><div></div><div></div><div></div><div></div><div></div><div></div><div></div><div></div><div></div><div></div><div></div><div></div><div></div><div></div><div></div><div></div><div></div><div></div><div></div><div></div><div></div><div></div><div></div><div></div><div></div><div></div><div></div><div></div><div></div><div></div><div></div><div></div><div></div><div></div><div></div><div></div><div></div><div></div><div></div><div></div><div></div><div></div><div></div><div></div><div></div><div></div><div></div><div></div><div></div><div></div><div></div><div></div><div></div><div></div><div></div><div></div><div></div><div></div><div></div><div></div><div></div><div></div><div></div><div></div><div></div><div></div><div></div><div></div><div></div><div></div><div></div><div></div><div></div><div></div><div></div><div></div><div></div><div></div><div></div><div></div><div></div><div></div><div></div><div></div><div></div><div></div><div></div><div></div><div></div><div></div><div></div><div></div><div></div><div></div><div></div><div></div><div></div><div></div><div></div><div></div><div></div><div></div><div></div><div></div><div></div><div></div><div></div><div></div><div></div><div></div><div></div><div></div><div></div><div></div><div></div><div></div><div></div><div></div><div></div><div></div><div></div><div></div><div></div><div></div><div></div><div></div><div></div><div></div><div></div><div></div><div></div><div></div><div></div><div></div><div></div><div></div><div></div><div></div><div></div><div></div><div></div><div></div><div></div><div></div><div></div><div></div><div></div><div></div><div></div><div></div><div></div><div></div><div></div><div></div><div></div><div></div><div></div><div></div><div></div><div></div><div></div><div></div><div></div><div></div><div></div><div></div><div></div><div></div><div></div><div></div><div></div><div></div><div></div><div></div><div></div><div></div><div></div><div></div><div></div><div></div><div></div><div></div><div></div><div></div><div></div><div></div><div></div><div></div><div></div><div></div><div></div><div></div><div></div><div></div><div></div><div></div><div></div><div></div><div></div><div></div><div></div><div></div><div></div><div></div><div></div><div></div><div></div><div></div><div></div><div></div><div></div><div></div><div></div><div></div><div></div><div></div><div></div><div></div><div></div><div></div><div></div><div></div><div></div><div></div><div></div><div></div><div></div><div></div><div></div><div></div><div></div><div></div><div></div><div></div><div></div><div></div><div></div><div></div><div></div><div></div><div></div><div></div><div></div><div></div><div></div><div></div><div></div><div></div><div></div><div></div><div></div><div></div><div></div><div></div><div></div><div></div><div></div><div></div><div></div><div></div><div></div><div></div><div></div><div></div><div></div><div></div><div></div><div></div><div></div><div></div><div></div><div></div><div></div><div></div><div></div><div></div><div></div><div></div><div></div><div></div><div></div><div></div><div></div><div></div><div></div><div></div><div></div><div></div><div></div><div></div><div></div><div></div><div></div><div></div><div></div><div></div><div></div><div></div><div></div><div></div><div></div><div></div><div></div><div></div><div></div><div></div><div></div><div></div><div></div><div></div><div></div><div></div><div></div><div></div><div></div><div></div><div></div><div></div><div></div><div></div><div></div><div></div><div></div><div></div><div></div><div></div><div></div><div></div><div></div><div></div><div></div><div></div><div></div><div></div><div></div><div></div><div></div><div></div><div></div><div></div><div></div><div></div><div></div><div></div><div></div><div></div><div></div><div></div><div></div><div></div><div></div><div></div></div> |
|--------------|----------------------------------------------------------------------------------------------------------------------------------------------------------------------------------------------------------------------------------------------------------------------------------------------------------------------------------------------------------------------------------------------------------------------------------------------------------------------------------------------------------------------------------------------------------------------------------------------------------------------------------------------------------------------------------------------------------------------------------------------------------------------------------------------------------------------------------------------------------------------------------------------------------------------------------------------------------------------------------------------------------------------------------------------------------------------------------------------------------------------------------------------------------------------------------------------------------------------------------------------------------------------------------------------------------------------------------------------------------------------------------------------------------------------------------------------------------------------------------------------------------------------------------------------------------------------------------------------------------------------------------------------------------------------------------------------------------------------------------------------------------------------------------------------------------------------------------------------------------------------------------------------------------------------------------------------------------------------------------------------------------------------------------------------------------------------------------------------------------------------------------------------------------------------------------------------------------------------------------------------------------------------------------------------------------------------------------------------------------------------------------------------------------------------------------------------------------------------------------------------------------------------------------------------------------------------------------------------------------------------------------------------------------------------------------------------------------------------------------------------------------------------------------------------------------------------------------------------------------------------------------------------------------------------------------------------------------------------------------------------------------------------------------------------------------------------------------------------------------------------------------------------------------------------------------------------------------------------------------------------------------------------------------------------------------------------------------------------------------------------------------------------------------------------------------------------------------------------------------------------------------------------------------------------------------------------------------------------------------------------------------------------------------------------------------------------------------------------------------------------------------------------------------------------------------------------------------------------------------------------------------------------------------------------------------------------------------------------------------------------------------------------------------------------------------------------------------------------------------------------------------------------------------------------------------------------------------------------------------------------------------------------------------------------------------------------------------------------------------------------------------------------------------------------------------------------------------------------------------------------------------------------------------------------------------------------------------------------------------------------------------------------------------------------------------------------------------------------------------------------------------------------------------------------------------------------------------------------------------------------------------------------------------------------------------------------------------------------------------------------------------------------------------------------------------------------------------------------------------------------------------------------------------------------------------------------------------------------------------------------------------------------------------------------------------------------------------------------------------------------------------------------------------------------------------------------------------------------------------------------------------------------------------------------------------------------------------------------------------------------------------------------------------------------------------------------------------------------------------------------------------------------------------------------------------------------------------------------------------------------------------------------------------------------------------------------------------------------------------------------------------------------------------------------------------------------------------------------------------------------------------------------------------------------------------------------------------------------------------------------------------------------------------------------------------------------------------------------------------------------------------------------------------------------------------------------------------------------------------------------------------------------------------------------------------------------------------------------------------------------------------------------------------------------------------------------------------------------------------------------------------------------------------------------------------------------------------------------------------------------------------------------------------------------------------------------------------------------------------------------------------------------------------------------------------------------------------------------------------------------------------------------------------------------------------------------------------------------------------------------------------------------------------------------------------------------------------------------------------------------------------------------------------------------------------------------------------------------------------------------------------------------------------------------------------------------------------------------------------------------------------------------------------------------------------------------------------------------------------------------------------------------------------------------------------------------------------------------------------------------------------------------------------------------------------------------------------------------------------------------------------------------------------------------------------------------------------------------------------------------------------------------------------------------------------------------------------------------------------------------------------------------------------------------------------------------------------------------------------------------------------------------------------------------------------------------------------------------------------------------------------------------------------------------------------------------------------------------------------------------------------------------------------------------------------------------------------------------------------------------------------------------------------------------------------------------------------------------------------------------------------------------------------------------------------------------------------------------------------------------------------------------------------------------------------------------------------------------------------------------------------------------------------------------------------------------------------------------------------------------------------------------------------------------------------------------------------------------------------------------------------------------------------------------------------------------------------------------------------------------------------------------------------------------------------------------------------------------------------------------------------------------------------------------------------------------------------------------------------------------------------------------------------------------------------------------------------------------------------------------------------------------------------------------------------------------------------------------------------------------------------------------------------------------------------------------------------------------------------------------------------------------------------------------------------------------------------------------------------------------------------------------------------------------------------------------------------------------------------------------------------------------------------------------------------------------------------------------------------------------------------------------------------------------------------------------------------------------------------------------------------------------------------------------------------------------------------------------------------------------------------------------------------------------------------------------------------------------------------------------------------------------------------------------------------------------------------------------------------------------------------------------------------------------------------------------------------------------------------------------------------------------------------------------------------------------------------------------------------------------------------------------------------------------------------------------------------------------------------------------------------------------------------------------------------------------------------------------------------------------------------------------------------------------------------------------------------------------------------------------------------------------------------------------------------------------------------------------------------------------------------------------------------------------------------------------------------------------------------------------------------------------------------------------------------------------------------------------------------------------------------------------------------------------------------------------------------------------------------------------------------------------------------------------------------------------------------------------------------------------------------------------------------------------------------------------------------------------------------------------------------------------------------------------------------------------------------------------------------------------------------------------------------------------------------------------------------------------------------------------------------------------------------------------------------------------------------------------------------------------------------------------------------------------------------------------------------------------------------------------------------------------------------------------------------------------------------------------------------------------------------------------------------------------------------------------------------------------------------------------------------------------------------------------------------------------------------------------------------------------------------------------------------------------------------------------------------------------------------------------------------------------------------------------------------------------------------------------------------------------------------------------------------------------------------------------------------------------------------------------------------------------------------------------------------------------------------------------------------------------------------------------------------------------------------------------------------------------------------------------------------------------------------------------------------------------------------------------------------------------------|
|--------------|----------------------------------------------------------------------------------------------------------------------------------------------------------------------------------------------------------------------------------------------------------------------------------------------------------------------------------------------------------------------------------------------------------------------------------------------------------------------------------------------------------------------------------------------------------------------------------------------------------------------------------------------------------------------------------------------------------------------------------------------------------------------------------------------------------------------------------------------------------------------------------------------------------------------------------------------------------------------------------------------------------------------------------------------------------------------------------------------------------------------------------------------------------------------------------------------------------------------------------------------------------------------------------------------------------------------------------------------------------------------------------------------------------------------------------------------------------------------------------------------------------------------------------------------------------------------------------------------------------------------------------------------------------------------------------------------------------------------------------------------------------------------------------------------------------------------------------------------------------------------------------------------------------------------------------------------------------------------------------------------------------------------------------------------------------------------------------------------------------------------------------------------------------------------------------------------------------------------------------------------------------------------------------------------------------------------------------------------------------------------------------------------------------------------------------------------------------------------------------------------------------------------------------------------------------------------------------------------------------------------------------------------------------------------------------------------------------------------------------------------------------------------------------------------------------------------------------------------------------------------------------------------------------------------------------------------------------------------------------------------------------------------------------------------------------------------------------------------------------------------------------------------------------------------------------------------------------------------------------------------------------------------------------------------------------------------------------------------------------------------------------------------------------------------------------------------------------------------------------------------------------------------------------------------------------------------------------------------------------------------------------------------------------------------------------------------------------------------------------------------------------------------------------------------------------------------------------------------------------------------------------------------------------------------------------------------------------------------------------------------------------------------------------------------------------------------------------------------------------------------------------------------------------------------------------------------------------------------------------------------------------------------------------------------------------------------------------------------------------------------------------------------------------------------------------------------------------------------------------------------------------------------------------------------------------------------------------------------------------------------------------------------------------------------------------------------------------------------------------------------------------------------------------------------------------------------------------------------------------------------------------------------------------------------------------------------------------------------------------------------------------------------------------------------------------------------------------------------------------------------------------------------------------------------------------------------------------------------------------------------------------------------------------------------------------------------------------------------------------------------------------------------------------------------------------------------------------------------------------------------------------------------------------------------------------------------------------------------------------------------------------------------------------------------------------------------------------------------------------------------------------------------------------------------------------------------------------------------------------------------------------------------------------------------------------------------------------------------------------------------------------------------------------------------------------------------------------------------------------------------------------------------------------------------------------------------------------------------------------------------------------------------------------------------------------------------------------------------------------------------------------------------------------------------------------------------------------------------------------------------------------------------------------------------------------------------------------------------------------------------------------------------------------------------------------------------------------------------------------------------------------------------------------------------------------------------------------------------------------------------------------------------------------------------------------------------------------------------------------------------------------------------------------------------------------------------------------------------------------------------------------------------------------------------------------------------------------------------------------------------------------------------------------------------------------------------------------------------------------------------------------------------------------------------------------------------------------------------------------------------------------------------------------------------------------------------------------------------------------------------------------------------------------------------------------------------------------------------------------------------------------------------------------------------------------------------------------------------------------------------------------------------------------------------------------------------------------------------------------------------------------------------------------------------------------------------------------------------------------------------------------------------------------------------------------------------------------------------------------------------------------------------------------------------------------------------------------------------------------------------------------------------------------------------------------------------------------------------------------------------------------------------------------------------------------------------------------------------------------------------------------------------------------------------------------------------------------------------------------------------------------------------------------------------------------------------------------------------------------------------------------------------------------------------------------------------------------------------------------------------------------------------------------------------------------------------------------------------------------------------------------------------------------------------------------------------------------------------------------------------------------------------------------------------------------------------------------------------------------------------------------------------------------------------------------------------------------------------------------------------------------------------------------------------------------------------------------------------------------------------------------------------------------------------------------------------------------------------------------------------------------------------------------------------------------------------------------------------------------------------------------------------------------------------------------------------------------------------------------------------------------------------------------------------------------------------------------------------------------------------------------------------------------------------------------------------------------------------------------------------------------------------------------------------------------------------------------------------------------------------------------------------------------------------------------------------------------------------------------------------------------------------------------------------------------------------------------------------------------------------------------------------------------------------------------------------------------------------------------------------------------------------------------------------------------------------------------------------------------------------------------------------------------------------------------------------------------------------------------------------------------------------------------------------------------------------------------------------------------------------------------------------------------------------------------------------------------------------------------------------------------------------------------------------------------------------------------------------------------------------------------------------------------------------------------------------------------------------------------------------------------------------------------------------------------------------------------------------------------------------------------------------------------------------------------------------------------------------------------------------------------------------------------------------------------------------------------------------------------------------------------------------------------------------------------------------------------------------------------------------------------------------------------------------------------------------------------------------------------------------------------------------------------------------------------------------------------------------------------------------------------------------------------------------------------------------------------------------------------------------------------------------------------------------------------------------------------------------------------------------------------------------------------------------------------------------------------------------------------------------------------------------------------------------------------------------------------------------------------------------------------------------------------------------------------------------------------------------------------------------------------------------------------------------------------------------------------------------------------------------------------------------------------------------------------------------------------------------------------------------------------------------------------------------------------------------------------------------------------------------------------------------------------------------------------------------------------------------------------------------------------------------------------------------------------------------------------------------------------------------------------------------------------------------------------------------------------------------------------------------------------------------------------------------------------------------------------------------------------------------------------------------------------------------------------------------------------------------------------------------------------------------------------------------------------------------------------------------------------------------------|

|                                                 | 90                                                                                | 100 | 110 | 120 | 130 | 140 | 150 | 160 |
|-------------------------------------------------|-----------------------------------------------------------------------------------|-----|-----|-----|-----|-----|-----|-----|
| conservation                                    |                                                                                   |     |     |     |     |     |     |     |
| Asian 'Arowana' Scribble                        | FMQLVELDISRNDIPEIPESIKFCKALEIADFSGNPLSRLPEGFTQLRGLAHLALNDVSLQTLPNDIGNLANLVTLELRE  | 160 |     |     |     |     |     |     |
| Cattle 'Scribble                                | FMQLVELDVSRNDIPEIPESIKFCKALEIADFSGNPLSRLPEGFTQLRSLAHLALNDVSLQALPGDVGNLANLVTLELRE  | 160 |     |     |     |     |     |     |
| Zebrafish 'Scribble                             | FTQLVELDISRNDISEIPENIKFCQSLEIADFSGNPLTRLPDGFTQLRGLAHLSLNDVSLQSLPNDIGNLSNLVTLELRE  | 160 |     |     |     |     |     |     |
| Coelacanth 'Scribble                            | .....                                                                             | 0   |     |     |     |     |     |     |
| Spotted 'gar' Scribble                          | FMQLVELDISRNDIPEIPESIKFCKALEIADFSGNPLSRLPDGFTQLRSLAHLALNDVSLQALPNDIGNLANLVTLELRE  | 156 |     |     |     |     |     |     |
| Chinese 'softshell' turtle 'Scribble            | FMQLVELDISRNDIPEIPESIKFCKSLEIADFSGNPLSRLPEGFTQLRSLGHLALNDVSLQSLPSDIGNLANLVTLELRE  | 108 |     |     |     |     |     |     |
| Zebra 'finch' Scribble                          | FMQLVELDISRNDIPEIPESIKFCKSLEIADFSGNPLSRLPEGFTQLRSLVHLALNDVSLQSLPTDIGNLANLVTLELRE  | 110 |     |     |     |     |     |     |
| Medaka 'Scribble                                | FMQLVELDISRNDIPEIPESIKFCRALEIADFSGNPLSRLPDGFTQLRTLALHLALNDVSLQTLPNDIGNLANLVTLELRE | 160 |     |     |     |     |     |     |
| Yenyuan 'stream' salamander 'Scribble' isoform1 | .....                                                                             | 0   |     |     |     |     |     |     |
| Yenyuan 'stream' salamander 'Scribble' isoform2 | .....                                                                             | 0   |     |     |     |     |     |     |
| Yenyuan 'stream' salamander 'Scribble' isoform3 | .....                                                                             | 0   |     |     |     |     |     |     |
| Yenyuan 'stream' salamander 'Scribble' isoform4 | .....                                                                             | 0   |     |     |     |     |     |     |
| Yenyuan 'stream' salamander 'Scribble' isoform5 | .....                                                                             | 0   |     |     |     |     |     |     |
| Yenyuan 'stream' salamander 'Scribble' isoform6 | .....                                                                             | 0   |     |     |     |     |     |     |
| Yenyuan 'stream' salamander 'Scribble' isoform7 | .....                                                                             | 0   |     |     |     |     |     |     |
| Yenyuan 'stream' salamander 'Scribble' isoform8 | .....                                                                             | 0   |     |     |     |     |     |     |
| Yenyuan 'stream' salamander 'Scribble' isoform9 | .....                                                                             | 0   |     |     |     |     |     |     |

|                                                 | 170                                                                                  | 180                     | 190      | 200 | 210 | 220 | 230 | 240 |   |
|-------------------------------------------------|--------------------------------------------------------------------------------------|-------------------------|----------|-----|-----|-----|-----|-----|---|
| conservation                                    |  |                         |          |     |     |     |     |     |   |
| Asian 'Arowana' Scribble                        | NLLKTLPTSLSFLVKLEQLDLGSNELEVLPDTLGALPNLRELLLLDRNHL                                   | SALPPELGNLRLVCLDVSENRL  | EQLPPELS | 240 |     |     |     |     |   |
| Cattle 'Scribble                                | NLLKSLPASLSFLVKLEQLDLGGNDLEVLPDTLGALPNLRELWLDNRNQL                                   | SALPPELGNLRLVCLDVSENRL  | EELPAELG | 240 |     |     |     |     |   |
| Zebrafish 'Scribble                             | NLLKSLPSSLSFLVKLEQLDLGSNVLEVLPDTLGALPNLRELWLDNRNQL                                   | SSLPPELGNLRQLVCLDVSENRL | SELPTEIS | 240 |     |     |     |     |   |
| Coelacanth 'Scribble                            |                                                                                      |                         |          |     |     |     |     |     | 0 |
| Spotted 'gar' Scribble                          | NLLKSLPTSLSFLVKLEQLDLGSNELEVLPDTLGALPNLRELWLDNRHLS                                   | SSLPPELGNLRLVCLDVSENRL  | EQLPSELS | 236 |     |     |     |     |   |
| Chinese 'softshell' turtle 'Scribble            | NLLKALPTSLSFLVKLEQLDLGGNDLEVLPDTLGALPNLRELWLDNRNQL                                   | SALPPELGNLRLVCLDVSENKL  | EHLPNELS | 188 |     |     |     |     |   |
| Zebra 'finch' Scribble                          | NLLKTLPTSLSFLVKLEQLDLGGNDLEVLPDTLGALPNLRELWLDNRNQL                                   | SALPPELGNLRLVCLDVSENKL  | EQLPNEVS | 190 |     |     |     |     |   |
| Medaka 'Scribble                                | NLLKSLPTSLSFLVKLEQLDLGSNELEDLPDTLGALPNLRELWLDNRNQL                                   | STLPEELGNLRLVCLDVSENRL  | EELPSELN | 240 |     |     |     |     |   |
| Yenyuan 'stream' salamander 'Scribble' isoform1 |                                                                                      |                         |          |     |     |     |     |     | 0 |
| Yenyuan 'stream' salamander 'Scribble' isoform2 |                                                                                      |                         |          |     |     |     |     |     | 0 |
| Yenyuan 'stream' salamander 'Scribble' isoform3 |                                                                                      |                         |          |     |     |     |     |     | 0 |
| Yenyuan 'stream' salamander 'Scribble' isoform4 |                                                                                      |                         |          |     |     |     |     |     | 0 |
| Yenyuan 'stream' salamander 'Scribble' isoform5 |                                                                                      |                         |          |     |     |     |     |     | 0 |
| Yenyuan 'stream' salamander 'Scribble' isoform6 |                                                                                      |                         |          |     |     |     |     |     | 0 |
| Yenyuan 'stream' salamander 'Scribble' isoform7 |                                                                                      |                         |          |     |     |     |     |     | 0 |
| Yenyuan 'stream' salamander 'Scribble' isoform8 |                                                                                      |                         |          |     |     |     |     |     | 0 |
| Yenyuan 'stream' salamander 'Scribble' isoform9 |                                                                                      |                         |          |     |     |     |     |     | 0 |

|                                             |  | 250                                                                                                                                                             | 260 | 270 | 280 | 290 | 300 | 310 | 320 |   |  |  |
|---------------------------------------------|--|-----------------------------------------------------------------------------------------------------------------------------------------------------------------|-----|-----|-----|-----|-----|-----|-----|---|--|--|
| conservation                                |  |                                                                                                                                                                 |     |     |     |     |     |     |     |   |  |  |
| Asian Arowana Scribble                      |  | G L L A L T D L L L S Q N L L E L L P D T L G S L K Q L S I L K V D Q N R L T H L T D S I G E C E N L S E L V L T E N L L Q T L P R S M G K L K K L N N L N V D |     | 320 |     |     |     |     |     |   |  |  |
| Cattle Scribble                             |  | G L V L L T D L L L S Q N L L Q R L P D G I G Q L K Q L S I L K V D Q N R L C E V T E A I G D C E N L S E L I L T E N L L T A L P H S L G K L T K L T N L N V D |     | 320 |     |     |     |     |     |   |  |  |
| Zebrafish Scribble                          |  | G L I A L T D L L L S E N L L E I L P D S I G S L K K L S I L K V N Q N R L V H L T D S I G E C E N L T E L M L T E N L L Q S L P R S L G K L K K L T N L N V D |     | 320 |     |     |     |     |     |   |  |  |
| Coelacanth Scribble                         |  | .                                                                                                                                                               | .   | .   | .   | .   | .   | .   | .   | 0 |  |  |
| Spotted gar Scribble                        |  | G L L A L T D L L L S Q N L L E T L P D S I G C L K Q L S I L K V D Q N R L T S L T D S I G E C E N L S E L M L T E N L L Q T L P R S L G K L K K L T N L N V D |     | 316 |     |     |     |     |     |   |  |  |
| Chinese softshell turtle Scribble           |  | G L V A L T D L L L S Q N L L E S I P D G I G Q L K Q L S I L K V D Q N R L V E V T E S I G D C E N L S E L I L T E N V L T A L P K S L G K L T K L T N L N V D |     | 268 |     |     |     |     |     |   |  |  |
| Zebra finch Scribble                        |  | G L V A L T D L L L S Q N L L E C I P D G I G Q L K Q L S I L K V D Q N R L T D M T E S I G D C E N L S E L I L T E N M L T A L P K S L G K L A K L T N L N V D |     | 270 |     |     |     |     |     |   |  |  |
| Medaka Scribble                             |  | G L L A L T D L L L T Q N L L E F V P D S I G S L K Q L S I L K V D Q N R M T N L T D S I G E C E N L T E L V L T E N L L Q S L P Q S L G K L K K L T N L N V D |     | 320 |     |     |     |     |     |   |  |  |
| Yenyuan stream salamander Scribble isoform1 |  | .                                                                                                                                                               | .   | .   | .   | .   | .   | .   | .   | 0 |  |  |
| Yenyuan stream salamander Scribble isoform2 |  | .                                                                                                                                                               | .   | .   | .   | .   | .   | .   | .   | 0 |  |  |
| Yenyuan stream salamander Scribble isoform3 |  | .                                                                                                                                                               | .   | .   | .   | .   | .   | .   | .   | 0 |  |  |
| Yenyuan stream salamander Scribble isoform4 |  | .                                                                                                                                                               | .   | .   | .   | .   | .   | .   | .   | 0 |  |  |
| Yenyuan stream salamander Scribble isoform5 |  | .                                                                                                                                                               | .   | .   | .   | .   | .   | .   | .   | 0 |  |  |
| Yenyuan stream salamander Scribble isoform6 |  | .                                                                                                                                                               | .   | .   | .   | .   | .   | .   | .   | 0 |  |  |
| Yenyuan stream salamander Scribble isoform7 |  | .                                                                                                                                                               | .   | .   | .   | .   | .   | .   | .   | 0 |  |  |
| Yenyuan stream salamander Scribble isoform8 |  | .                                                                                                                                                               | .   | .   | .   | .   | .   | .   | .   | 0 |  |  |
| Yenyuan stream salamander Scribble isoform9 |  | .                                                                                                                                                               | .   | .   | .   | .   | .   | .   | .   | 0 |  |  |

| conservation                                    |                                                                                    |     |
|-------------------------------------------------|------------------------------------------------------------------------------------|-----|
| Asian 'Arowana' Scribble                        | RNRLYSVPEELGGCTSLNVLSLRDNRLARLPAELAGATELHVLDVAGNRLRNLPFALANLNLKAMWLAENQSQPMLKFQM   | 400 |
| Cattle 'Scribble                                | RNHLEALPPEIGGCVALSVLSLRDNRLAVLPPELAHTAELHVLDVAGNRLQSLPFPALHTLNLKALWLAENQAQPMLRFQT  | 400 |
| Zebrafish 'Scribble                             | RNRLSSVPAELGGCVSLNVLSLRDNRLGKLPELANATELHVLDVAGNRLQNLPPFALANLNLKAMWLAENQSQPMLKFQT   | 400 |
| Coelacanth 'Scribble                            | .....SRLQNLPPFALTNLNLKALWLAENQSQPMLKFQT                                            | 33  |
| Spotted 'gar' Scribble                          | RNRLTCLPVELGGCTGLNVLSLRDNRVAKLPAELASATELHVLDVAGNRLQNLPPFALTNLNLKAMWLAENQSQPMLKFQT  | 396 |
| Chinese 'softshell' turtle 'Scribble            | RNRLTALPSEIGGCASLNVLSLRDNRLALLPPELANTTTELHVLDVAGNRLQNLPPFALTNLNLKALWLAENQSQPMLKFQT | 348 |
| Zebra 'finch' Scribble                          | RNRLTALPAEIGGCANLSVLSLRDNRLALLPPELANTTTELHVLDVAGNRLQNLPPFALTNLNLKALWLAENQSQPMLKFQT | 350 |
| Medaka 'Scribble                                | RNRLSSVPKELGGCSSLNVLSLRDNRLGKLPAELADATELHVLDVAGNRLQNLPPSLTNLNLKAMWLAENQSQPMLKFQT   | 400 |
| Yenyuan 'stream' salamander 'Scribble' isoform1 | .....                                                                              | 0   |
| Yenyuan 'stream' salamander 'Scribble' isoform2 | .....                                                                              | 0   |
| Yenyuan 'stream' salamander 'Scribble' isoform3 | .....                                                                              | 0   |
| Yenyuan 'stream' salamander 'Scribble' isoform4 | .....                                                                              | 0   |
| Yenyuan 'stream' salamander 'Scribble' isoform5 | .....                                                                              | 0   |
| Yenyuan 'stream' salamander 'Scribble' isoform6 | .....                                                                              | 0   |
| Yenyuan 'stream' salamander 'Scribble' isoform7 | .....                                                                              | 0   |
| Yenyuan 'stream' salamander 'Scribble' isoform8 | .....                                                                              | 0   |
| Yenyuan 'stream' salamander 'Scribble' isoform9 | .....                                                                              | 0   |

| conservation                                    |                                                                                  |     |
|-------------------------------------------------|----------------------------------------------------------------------------------|-----|
| Asian 'Arowana' Scribble                        | EDDEQTGEKVLTCYLLPQQPSPSL...EDLPPNSVDDSW.TDSNLRVSTIQFQEEPKAEEDDEETAAERKGLQRRAT    | 474 |
| Cattle 'Scribble                                | EDDAQTGEKVLTCYLLPQQPLPSL...EDPELQSSPSES.W.GDAPLSRVSVIQFLEAPAGDDDPEEAAAAEKRLQRRAT | 475 |
| Zebrafish 'Scribble                             | EDDEQTGEKVLTCYLLPQQPSSSL...ENLLERSVDEAWPTDTNLRVSVIQFRDDSKHEEEDDETAADKRGLQRRAT    | 475 |
| Coelacanth 'Scribble                            | EDDEKTGEKVLTCYLFPPQQPSPSL...ENLLQNSMDENW.TDTNLRVSVIQFQEEPKPEDDDDEEAAERRGLQRRAT   | 107 |
| Spotted 'gar' Scribble                          | EDDEKTGEKVLTCYLLPQQPSPSL...ENLLQNSVDDSW.TDSNLRVSVIQFQEETKPEAEDEDTAERRGLQRRAT     | 470 |
| Chinese 'softshell' turtle 'Scribble            | EDDEKTGEKVLTCYLLPQQPSPSLGKRSHENLLQNSVDES.W.TDTNLRVSVIQFLDEPRADDE.EEAGAEKRGLQRRAT | 426 |
| Zebra 'finch' Scribble                          | EDDEKTGEKVLTCYLLPQQPSPSL...ENLLQNSVDES.W.TDTNLRVSVIQFLDEPKGDDD.EESGAERRGLQRRAT   | 423 |
| Medaka 'Scribble                                | EDDERTGEKVLTCYLLPQQPSPSL...ENLLQSSVDDSW.TDSNLRVSVIQFQEETKGEDEDEEAAERRGLQRRAT     | 474 |
| Yenyuan 'stream' salamander 'Scribble' isoform1 | .....                                                                            | 0   |
| Yenyuan 'stream' salamander 'Scribble' isoform2 | .....                                                                            | 0   |
| Yenyuan 'stream' salamander 'Scribble' isoform3 | .....                                                                            | 0   |
| Yenyuan 'stream' salamander 'Scribble' isoform4 | .....                                                                            | 0   |
| Yenyuan 'stream' salamander 'Scribble' isoform5 | .....                                                                            | 0   |
| Yenyuan 'stream' salamander 'Scribble' isoform6 | .....                                                                            | 0   |
| Yenyuan 'stream' salamander 'Scribble' isoform7 | .....                                                                            | 0   |
| Yenyuan 'stream' salamander 'Scribble' isoform8 | .....                                                                            | 0   |
| Yenyuan 'stream' salamander 'Scribble' isoform9 | .....                                                                            | 0   |



| conservation                                    |                                                                                    |     |
|-------------------------------------------------|------------------------------------------------------------------------------------|-----|
| Asian 'Arowana' Scribble                        | LTDRVNSSLQ...PVKGVSFQVNNLLIEPARIEEEEELTLTIVRQTGGLGISIAGGRGSTPYKGDDEGIFISRVSEEGP    | 766 |
| Cattle 'Scribble                                | AAAEKEKA.VASAPSVKGVSFQVNNLLIEPARIEEEEELTLTIVRQTGGLGISIAGGKGSTPYKGDDEGIFISRVSEEGP   | 756 |
| Zebrafish 'Scribble                             | .....FQHRLDAAELEDIRMSQMSSL.QPVKL.....TSLILRQTGGLGISIAGGKGSTPYKGDDEGIFISRVSEEGP     | 750 |
| Coelacanth 'Scribble                            | LMMMGPFR..SSWNLKKGVSFQVNNLLIEPARIEEEEELTLTIHRQTGGLGISIAGGKGSTPYKGDDEGIFISRVSEEGP   | 396 |
| Spotted 'gar' Scribble                          | LSDRGSASLQ...PVKGVSFQVNNLLIEPARIEEEEELTLTILRQTGGLGISIAGGKGSTPYKGDDEGIFISRVSEEGP    | 754 |
| Chinese 'softshell' turtle 'Scribble            | ...VKD GALPTQPSVKGVSFDQVNNLLIEPARIEEEEELTLTILRQTGGLGISIAGGKGSTPYKGDDEGIFISRVSEEGP  | 680 |
| Zebra 'finch' Scribble                          | VSRQPGSGVQLWSPA V TGVSFQVNNLLIEPARIEEEEELTLTIVRQTGGLGISIAGGKGSTPYKGDDEGIFISRVSEEGP | 705 |
| Medaka 'Scribble                                | MEELGDSRLQVNSSQVKGVSFDQVNNLLIEPARIEEEEHTITITRQTGGLGISIAGGKGSTPYKGDDEGIFISRVSAEGP   | 755 |
| Yenyuan 'stream' salamander 'Scribble' isoform1 | .....                                                                              | 0   |
| Yenyuan 'stream' salamander 'Scribble' isoform2 | .....GIFISRVAAEGP                                                                  | 12  |
| Yenyuan 'stream' salamander 'Scribble' isoform3 | .....                                                                              | 0   |
| Yenyuan 'stream' salamander 'Scribble' isoform4 | .....                                                                              | 0   |
| Yenyuan 'stream' salamander 'Scribble' isoform5 | .....GIFISRVAAEGP                                                                  | 12  |
| Yenyuan 'stream' salamander 'Scribble' isoform6 | .....                                                                              | 0   |
| Yenyuan 'stream' salamander 'Scribble' isoform7 | .....                                                                              | 0   |
| Yenyuan 'stream' salamander 'Scribble' isoform8 | .....                                                                              | 0   |
| Yenyuan 'stream' salamander 'Scribble' isoform9 | .....GIFISRVAAEGP                                                                  | 12  |

[illegible]

conservation

Asian Arowana Scribble

Cattle Scribble

Zebrafish Scribble

Coelacanth Scribble

Spotted gar Scribble

Chinese softshell turtle Scribble

Zebra finch Scribble

Medaka Scribble

Yenyuan stream salamander Scribble isoform1

Yenyuan stream salamander Scribble isoform2

Yenyuan stream salamander Scribble isoform3

Yenyuan stream salamander Scribble isoform4

Yenyuan stream salamander Scribble isoform5

Yenyuan stream salamander Scribble isoform6

Yenyuan stream salamander Scribble isoform7

Yenyuan stream salamander Scribble isoform8

Yenyuan stream salamander Scribble isoform9

850 860 870 880 890 900 910 920

FCTEP...CFSQGTRQRLSTCLVRNDKGLGFSIAGGKGSTPYRVGDMGIFISRIAEGGAADRDSILQVGDRLVISINGVDM 920

LPLLPEPPG...PPRQRHVACLVRSEKGLGFSIAGGKGSTPYRAGDGGIFISRIAEGGAHRAGTLQVGDRLVISINGVDM 911

FLLDPCPAVSTGPAQRLATCLIRNDKGLGFSIAGGKGSTLYRVGDTGIFISRIAEGGAHRDNLQVGDRLVISINGVDM 907

FASEE...PEIPVREQFSTCLMRNEKGLGFSIAGGKGSTPYKAGDTGIFISRIAEGGAHRDGILQVGDRLVISINGVSM 549

.....PNSPGASGPCQRLSTCLVRNDKGLGFSIAGGKGSTPYHTGDTGIFISRIAEGGAHRDGTDLHVGDRLVITINGVDM 907

.....PEGAPPTERFSTCLVRNEKGLGFSIAGGKGSTPYKAGDMGIFISRIAEGGAHRDGTDLRVGDRLVISINGVDM 832

.....PEAAPATERFSTCLMRNEKGLGFSIAGGKGSTPYRAGDMGIFISRIAEGGAHRDGTDLRVGDRLVISINGVDM 857

FNLEP...TTS GPQQLTTCLIRNDKGLGFSIAGGKGSTPYRTGDTGIYISRIAEGGAHRDSVLCVGDRLVISINGVDM 908

VEEEEEETAVVPVPTERFSTCLMRNEKGLGFSIAGGKGSTPYRVGDTGIFISRIAEAGAAHKDGKLNVDRLVISINGVDM 0

.....LDYKTLAALPSTSLQK.....VNRLADSDT..... 43

.....LDYKTLAALPSTSLQK.....VNRLADSDT..... 43

VEEEEEETAVVPVPTERFSTCLMRNEKGLGFSIAGGKGSTPYRVGDTGIFISRIAEAGAAHKDGKLNVDRLVISINGVDM 172

.....LDYKTLAALPSTSLQK.....VNRLADSDT..... 43

.....LDYKTLAALPSTSLQK.....VNRLADSDT..... 43

.....LDYKTLAALPSTSLQK.....VNRLADSDT..... 15

VEEEEEETAVVPVPTERFSTCLMRNEKGLGFSIAGGKGSTPYRVGDTGIFISRIAEAGAAHKDGKLNVDRLVISINGVDM 172



conservation

|                                                 |                       |                 |                    |                          |               |                 |                 |     |
|-------------------------------------------------|-----------------------|-----------------|--------------------|--------------------------|---------------|-----------------|-----------------|-----|
| Asian 'Arowana 'Scribble                        | TDARHDQAVALLTGTSP     | TITLLVERDQ      | GD                 | .....                    | PRARPHSPPPPQ  | PSE.SLDQEE..... | SQANHL.N        | 978 |
| Cattle 'Scribble                                | TEARHDHSVSLTTAASPTIAL | LLC             | SSCGRC.....        | AGQRLSRDAHPHSPPPP        | TATP.ATPGE    | GPLR...LPPS     | LLA             | 979 |
| Zebrafish 'Scribble                             | TEARHDQAVALLTGTSP     | TITLLVVDRE      | QSSV.....          | GGAS..PRTRPHSPPPP        | EP            | SD.SPEQED       | GGDE...HLGNHL.N | 973 |
| Coelacanth 'Scribble                            | TDARHDQAVALLTGTSP     | TITLLVERETLE    | PPSD.GEAGAS        | PALYRARPHSPPPPPG         | QADP          | SEGENRNEEEI     | VAQSNH          | 628 |
| Spotted 'gar 'Scribble                          | TEARHDQAVTLLTGTSP     | TITLLVERDVGD    | PAADSAGLGGSP       | ALARARPHSPPPP            | PCD.TPDQED    | ISED            | RAYPQDNHL.S     | 985 |
| Chinese 'softshell 'turtle 'Scribble            | TEARHDQAVALLTASSPTIAL | LLVEREGAEQ..... | LSEGDSPVAPRAHSPPPP | SSHGES                   | PPEETALL..... | QRDHL.S         | 900             |     |
| Zebra 'finch 'Scribble                          | TEARHDQAVALLTAASPTIV  | LLVEREGAEQ..... | PGE                | GGSPRHALPPAIPRTWDDIIISTP | ASTVISA       | AVNQYL.S        | 928             |     |
| Medaka 'Scribble                                | TEARHDQAVALLTGTSP     | TISLVVERDP      | PKAS.....          | MGSPGQSRARAHSPPP         | PE            | SD.SPDQDE       | EGLQ....GNHL.G  | 974 |
| Yenyuan 'stream 'salamander 'Scribble 'isoform1 | .....                 | .....           | .....              | .....                    | .....         | .....           | 0               |     |
| Yenyuan 'stream 'salamander 'Scribble 'isoform2 | TEARHDQAVALLTGSSPTIT  | LLVEREII        | IAPGTE.ADLGAS      | PALQRT                   | TRPHSPPPP     | SHLD.AGEEDD     | GQ              | 249 |
| Yenyuan 'stream 'salamander 'Scribble 'isoform3 | .....HTLAMETDCQVL     | QG              | LLPSTDS            | GG                       | .....         | .....           | QSQGLAS         | 74  |
| Yenyuan 'stream 'salamander 'Scribble 'isoform4 | .....HTLAMETDCQVL     | QG              | LLPSTDS            | GG                       | .....         | .....           | QSQGLAS         | 74  |
| Yenyuan 'stream 'salamander 'Scribble 'isoform5 | TEARHDQAVALLTGSSPTIT  | LLVEREII        | IAPGTE.ADLGAS      | PALQRT                   | TRPHSPPPP     | SHLD.AGEEDD     | GQ              | 249 |
| Yenyuan 'stream 'salamander 'Scribble 'isoform6 | .....HTLAMETDCQVL     | QG              | LLPSTDS            | GG                       | .....         | .....           | QSQGLAS         | 74  |
| Yenyuan 'stream 'salamander 'Scribble 'isoform7 | .....HTLAMETDCQVL     | QG              | LLPSTDS            | GG                       | .....         | .....           | QSQGLAS         | 74  |
| Yenyuan 'stream 'salamander 'Scribble 'isoform8 | .....                 | .....           | .....              | .....                    | .....         | .....           | 15              |     |
| Yenyuan 'stream 'salamander 'Scribble 'isoform9 | TEARHDQAVALLTGSSPTIT  | LLVEREII        | IAPGTE.ADLGAS      | PALQRT                   | TRPHSPPPP     | SHLD.AGEEDD     | GQ              | 249 |

conservation

|                                                 |  |
|-------------------------------------------------|--|
| Asian 'Arowana 'Scribble                        |  |
| Cattle 'Scribble                                |  |
| Zebrafish 'Scribble                             |  |
| Coelacanth 'Scribble                            |  |
| Spotted 'gar 'Scribble                          |  |
| Chinese softshell 'turtle 'Scribble             |  |
| Zebra 'finch 'Scribble                          |  |
| Medaka 'Scribble                                |  |
| Yenyuan 'stream 'salamander 'Scribble 'isoform1 |  |
| Yenyuan 'stream 'salamander 'Scribble 'isoform2 |  |
| Yenyuan 'stream 'salamander 'Scribble 'isoform3 |  |
| Yenyuan 'stream 'salamander 'Scribble 'isoform4 |  |
| Yenyuan 'stream 'salamander 'Scribble 'isoform5 |  |
| Yenyuan 'stream 'salamander 'Scribble 'isoform6 |  |
| Yenyuan 'stream 'salamander 'Scribble 'isoform7 |  |
| Yenyuan 'stream 'salamander 'Scribble 'isoform8 |  |
| Yenyuan 'stream 'salamander 'Scribble 'isoform9 |  |

|           |                 |                       |                    |               |               |                   |                   |      |
|-----------|-----------------|-----------------------|--------------------|---------------|---------------|-------------------|-------------------|------|
| RALEDEYPV | EEVTLVK         | TGGPLGLSIVGGSDHASH    | PF                 | GVTEPGVFISKV  | VLQGLACNS     | GLRVGDRILEV       | NGIDLRHATHQE      | 1058 |
| AAL       | EGPYPVEE        | ICLPRA                | GGPLGLSIVGGSDHSSHP | FGVQEPGVFISKV | LP            | GLAARSGLRVGD      | RILAVNGQDVREATHQE | 1059 |
| CPMEDEYPI | EEVTLIK         | AGGPLGLSIVGGSDHASH    | PF                 | GINEPGVFISKV  | IP            | NGLASQSGLRVGD     | RILEVNSIDLRHATHQE | 1053 |
| REMEDDYP  | VEVRHL..        | AGILSIELAGKSDDNFSSV   | SLGPP              | CVYIRKVI      | PP            | GLAARSGLRVGD      | RILEVNAIDLRHATHQE | 705  |
| RQLEDEYPI | EEVTLMK         | AGGPLGLSIVGGSDHASH    | PF                 | GISEPGVFISKV  | IP            | QLAAQSGLRVGD      | RILEVNSIDLRHATHQE | 1065 |
| KGLEDQYPI | EEICLIK         | AGGPLGLSIVGGSDHSSHP   | FGI                | QEPGVFISKV    | IPHGLAS       | RSGLRVGDRILEV     | NTIDLRHATHQE      | 980  |
| KGLEDQYP  | VEEIRLVK        | AGGPLGLSIVGGSDHSSHP   | FGI                | HEPGVFISKV    | IP            | RGLASRSGLRVGD     | RILEVNGIDLRHATHQE | 1008 |
| .QMEDQYPI | EEVTL           | LLKSGGPLGLSIVGGSDHASH | PF                 | GVNEPGVFISKV  | IPHGLAS       | QSGLRVGD          | RILEVNSIDLRHATHQE | 1053 |
| .....     | .....           | .....                 | .....              | .....         | .....         | .....             | 0                 |      |
| RGMEDEYPM | EEVLLLK         | AGGPLGLSIVGGSDHSSHP   | FGVHEPGVFISKV      | IP            | QGLAARSGLRVGD | RILEVNTIDLRHATHQE | 329               |      |
| AAAPQELV  | VNCVNICPAA..... | .....                 | .....              | .....         | VPEGAPLYHTV   | QLEEK             | TAAAG...EQTAHST   | 120  |
| AAAPQELV  | VNCVNICPAA..... | .....                 | .....              | .....         | VPEGAPLYHTV   | QLEEK             | TAAAG...EQTAHST   | 120  |
| RGMEDEYPM | EEVLLLK         | AGGPLGLSIVGGSDHSSHP   | FGVHEPGVFISKV      | IP            | QGLAARSGLRVGD | RILEVNTIDLRHATHQE | 329               |      |
| AAAPQELV  | VNCVNICPAA..... | .....                 | .....              | .....         | VPEGAPLYHTV   | QLEEK             | TAAAG...EQTAHST   | 120  |
| AAAPQELV  | VNCVNICPAA..... | .....                 | .....              | .....         | VPEGAPLYHTV   | QLEEK             | TAAAG...EQTAHST   | 120  |
| .....     | .....           | .....                 | .....              | .....         | .....         | .....             | 15                |      |
| RGMEDEYPM | EEVLLLK         | AGGPLGLSIVGGSDHSSHP   | FGVHEPGVFISKV      | IP            | QGLAARSGLRVGD | RILEVNTIDLRHATHQE | 329               |      |

conservation

|                                                 |            |             |            |       |             |                 |                 |       |       |              |               |              |      |     |
|-------------------------------------------------|------------|-------------|------------|-------|-------------|-----------------|-----------------|-------|-------|--------------|---------------|--------------|------|-----|
| Asian 'Arowana 'Scribble                        | AVRALLSSKH | EIRMLVRRDP  | APP        | GMQ   | EIEIQKYPGEK | LGISIRGGAKGHAGN | PF              | DP    | TE    | EGVFISKVSSSG | AAARDGRLQV    | 1138         |      |     |
| Cattle 'Scribble                                | AVSALLRPC  | LELVLLVRRDP | PPPP       | GMRE  | LCIQKAPGER  | LGISIRGGAKGHAGN | PF              | CD    | PT    | DE           | EGIFISKVSPTGA | AGRDGRLRV    | 1139 |     |
| Zebrafish 'Scribble                             | AVRALLSNKQ | EIRMLVRRDP  | SPPP       | GMQ   | EIVIHKQPGEK | LGISIRGGAKGHAGN | PF              | DP    | TE    | EGIFISKVSSNG | AAARDGRLRV    | 1133         |      |     |
| Coelacanth 'Scribble                            | AVKALLSNKQ | EIRMLVRRDP  | PPPP       | GMAV  | QEKKSEPSVC  | IGQTQNPDISH     | NP              | GNIF  | FKLRD | LLFLPSQVSSSG | AAARDGRLKV    | 785          |      |     |
| Spotted 'gar 'Scribble                          | AVRALLSNKQ | EIRMLVRRDP  | APP        | GMQ   | DIVIEKLAGEK | LGISIRGGAKGHAGN | PF              | DP    | TE    | EGIFISKVSSSG | AAARDGRLQV    | 1145         |      |     |
| Chinese softshell 'turtle 'Scribble             | AVNALLSSTQ | ALSMLVRRDP  | PPPP       | GMQ   | EICIEKAPGEK | LGISIRGGAKGHAGN | PF              | DP    | TE    | EGIFISKVSSSG | AAARDGRLKV    | 1060         |      |     |
| Zebra 'finch 'Scribble                          | AVNALLSNTQ | ELSMLVRRDP  | PPPP       | GMQ   | EICIEKAPGEK | LGISIRGGAKGHAGN | PF              | DP    | TE    | EGIFISKVSSSG | AAARDGRLQV    | 1088         |      |     |
| Medaka 'Scribble                                | AVRSL      | LANKQ       | EIRMLVRRDP | SPPP  | GMQ         | EVVIQKQPGEK     | LGISIRGGAKGHAGN | PF    | DA    | TE           | EGVFISKVSS    | TGAAARDGRLQV | 1133 |     |
| Yenyuan 'stream 'salamander 'Scribble 'isoform1 | .....      | .....       | .....      | ..... | .....       | .....           | .....           | ..... | YSPT  | T            | QQQ           | .....        | 8    |     |
| Yenyuan 'stream 'salamander 'Scribble 'isoform2 | AVNALLSNSQ | EIRMLVRRDP  | PPPP       | GMQ   | EISIDKCPGEK | LGISIRGGAKGHAGN | PF              | DP    | TE    | EGIFISRVSSSG | AAARDGRLRV    | 409          |      |     |
| Yenyuan 'stream 'salamander 'Scribble 'isoform3 | SVRPTSESGT | ETAHHL      | PQ         | DLK   | PR          | TP              | .....           | ..... | PF    | APT          | PETL          | .....        | Q    | 159 |
| Yenyuan 'stream 'salamander 'Scribble 'isoform4 | SVRPTSESGT | ETAHHL      | PQ         | DLK   | PR          | TP              | .....           | ..... | PF    | APT          | PETL          | .....        | Q    | 159 |
| Yenyuan 'stream 'salamander 'Scribble 'isoform5 | AVNALLSNSQ | EIRMLVRRDP  | PPPP       | GMQ   | EISIDKCPGEK | LGISIRGGAKGHAGN | PF              | DP    | TE    | EGIFISRVSSSG | AAARDGRLRV    | 409          |      |     |
| Yenyuan 'stream 'salamander 'Scribble 'isoform6 | SVRPTSESGT | ETAHHL      | PQ         | DLK   | PR          | TP              | .....           | ..... | PF    | APT          | PETL          | .....        | Q    | 159 |
| Yenyuan 'stream 'salamander 'Scribble 'isoform7 | SVRPTSESGT | ETAHHL      | PQ         | DLK   | PR          | TP              | .....           | ..... | PF    | APT          | PETL          | .....        | Q    | 159 |
| Yenyuan 'stream 'salamander 'Scribble 'isoform8 | .....      | .....       | .....      | ..... | .....       | .....           | .....           | ..... | ..... | .....        | .....         | 15           |      |     |
| Yenyuan 'stream 'salamander 'Scribble 'isoform9 | AVNALLSNSQ | EIRMLVRRDP  | PPPP       | GMQ   | EISIDKCPGEK | LGISIRGGAKGHAGN | PF              | DP    | TE    | EGIFISRVSSSG | AAARDGRLRV    | 409          |      |     |

|                                             |                                                                                   |      |
|---------------------------------------------|-----------------------------------------------------------------------------------|------|
| conservation                                |  |      |
| Asian Arowana Scribble                      | GMRILEVNNQSLLGMSHTEAVRVLRAAGDSLIIILVCDGFDPRDAAAVESSPGIIANPF...IVRKNSMESISSIDRDMSP | 1215 |
| Cattle Scribble                             | GLRILLEVNQQSLGLTHGEAVQLLRSVGDTLTVLVCDGFDTSAAATP.EVSPGIIANPFAAGLGRNLSISSIDRELS     | 1218 |
| Zebrafish Scribble                          | GMRILEVGNNSLLGMTHTEAVRVLRASGDSLVMLICDGFDPKSASTIEASPGVIANPFAAGIVRKNSMESISSVDRDLSP  | 1213 |
| Coelacanth Scribble                         | GVRILEVNNHSLGMTHTEAVRILRSIGDTLLVLVCDGFDPKAAAAIEASPGIIANPFVAGMGRKNSMESISSIDRDLSP   | 865  |
| Spotted gar Scribble                        | GMRILEVNGHSLGMTHTEAVRTLRGVGDTLAVLVCDGFDPRDAAAVEASPGVIANPFAAGIGRKNSMESISSIDRELS    | 1225 |
| Chinese softshell turtle Scribble           | GLRILEVNHQSLGMTHTEAVQILRSVGDKLLVLVCDGFDPKAAAAIEMSPGIIANPFAAGIGRKNSLESISSIDRDLTP   | 1140 |
| Zebra finch Scribble                        | GMRILEVNHQSLGMTHTEAVQVLRGVGDALLVLVCDGFDPKAAAAIEMSPGIIANPFAAGIGRKNSLESISSIDRDLSP   | 1168 |
| Medaka Scribble                             | GMRILEVNNHSLGMTHTEAVRVLRAVGDSLMLVCDGFDPPQKVTSEASPGIIANPFAAGIVRKNSMESISSIDRDLSP    | 1213 |
| Yenyuan stream salamander Scribble isoform1 | .....NHQSLGMTHTEAVRILRAVGDTLLVLVCDGFDPRAAAAIEVS.....                              | 8    |
| Yenyuan stream salamander Scribble isoform2 | GMRILEVNHQSLGMTHTEAVQILRAVGDTLLVLVCDGFDPRAAAAIEVS.....                            | 489  |
| Yenyuan stream salamander Scribble isoform3 | GEEETLVDSQPIL.....FSENPFVVAN.....RKKGKAGSGACLGG....                               | 195  |
| Yenyuan stream salamander Scribble isoform4 | GEEETLVDSQPIL.....FSENPFVVAN.....RKKGKAGSGACLGG....                               | 195  |
| Yenyuan stream salamander Scribble isoform5 | GMRILEVNHQSLGMTHTEAVQILRAVGDTLLVLVCDGFDPRAAAAIEVSPGIIANPFASGIARKNSMESISSIDRDMSP   | 489  |
| Yenyuan stream salamander Scribble isoform6 | GEEETLVDSQPIL.....FSENPFVVAN.....RKKGKAGSGACLGG....                               | 195  |
| Yenyuan stream salamander Scribble isoform7 | GEEETLVDSQPIL.....FSENPFVVAN.....RKKGKAGSGACLGG....                               | 195  |
| Yenyuan stream salamander Scribble isoform8 | .....                                                                             | 15   |
| Yenyuan stream salamander Scribble isoform9 | GMRILEVNHQSLGMTHTEAVQILRAVGDTLLVLVCDGFDPRAAAAIEVSPGIIANPFASGIARKNSMESISSIDRDMSP   | 489  |

|                                             |                                                                                    |      |
|---------------------------------------------|------------------------------------------------------------------------------------|------|
| conservation                                |  |      |
| Asian Arowana Scribble                      | EEMAIMQK...EVMVQDTPRWDKEDIEDVERMLREREEANRLLEKEAETFGTGPLKLDYRTLAALPTTSLQ.KVMRGL     | 1290 |
| Cattle Scribble                             | EGPGK.....EKELPGQIPLWGPEAMSAPQ.....GRSPESLKPACRALAATPGAGSMQRVLPAA                  | 1273 |
| Zebrafish Scribble                          | EEIDIMQK...EVMVRETSQWEREEMEKVERMLREREEATRLLLEEETESLSSGPLKLDYKTLAALPTTSLQ.KVNRAS    | 1288 |
| Coelacanth Scribble                         | EEMEIIQK...EMEMVRETTRWEREEMEKV.....SYNTEPLKLDYKTLAALPATSLQ.KVNRGS                  | 921  |
| Spotted gar Scribble                        | EEMDIIQK...EVMVREASQWEREEIEKV.....NFSPGPLKLDYKTLAALPTTSLQ.KVTRSS                   | 1281 |
| Chinese softshell turtle Scribble           | EELEILQK...EMEMVREATQWEREEMEKV.....NISSEPLRLDYRTLAALPTNNFP.RVTRAV                  | 1196 |
| Zebra finch Scribble                        | EELEILQKVAGSTLQMFPQLNLAQKQGDE.....PLRLDYRTLAALPSSGLQ.RGNRAA                        | 1221 |
| Medaka Scribble                             | EEIDIMQK...ESEMVRETSQWEREEMEKV.....NISTGPLKLDYKTLAALPTSSLQ.KINRAP                  | 1269 |
| Yenyuan stream salamander Scribble isoform1 | .....P.....AAPRSVQLSGRETRFA                                                        | 25   |
| Yenyuan stream salamander Scribble isoform2 | EEIEILQK...EMEMVRETSQWEKEELEKV.....SYLTQPLKLDYKTLAALPSTSLQ.KVNRTP                  | 545  |
| Yenyuan stream salamander Scribble isoform3 | .....P.PVGYGKSGVLKTNMFS...KKTP                                                     | 216  |
| Yenyuan stream salamander Scribble isoform4 | .....P.PVGYGKSGVLKTNMFS...KKTP                                                     | 216  |
| Yenyuan stream salamander Scribble isoform5 | EEIEILQK...EMEMVRETSQWEKEELEKV.....SYLTQPLKLDYKTLAALPSTSLQ.KVNRTP                  | 545  |
| Yenyuan stream salamander Scribble isoform6 | .....P.PVGYGKSGVLKTNMFS...KKTP                                                     | 216  |
| Yenyuan stream salamander Scribble isoform7 | .....P.PVGYGKSGVLKTNMFS...KKTP                                                     | 216  |
| Yenyuan stream salamander Scribble isoform8 | .....PLKLDYKTLAALPSTSLQ.KVNRTP                                                     | 39   |
| Yenyuan stream salamander Scribble isoform9 | EEIEILQK...EMEMVRETSQWEKEELEKV.....SYLTQPLKLDYKTLAALPSTSLQ.KVNRTP                  | 545  |

|                                             |                                                                                      |      |
|---------------------------------------------|--------------------------------------------------------------------------------------|------|
| conservation                                |  |      |
| Asian Arowana Scribble                      | SSE.PQGVHSPSRDIAGSPSS.PASLHFVSTASPKEN..IPTRPGVIQPLSRMWSNS.TVNQDTRNSPKAFHHGGVPATS     | 1365 |
| Cattle Scribble                             | SGE.M.....AEPFCSPSHQQ.....PPSPSPAELPANV                                              | 1302 |
| Zebrafish Scribble                          | PSE.PFRIDSPVRDAAHSPHNSQSNHFPSNANTKDN..ASTKPGAIQPLSRVRPPVSPASQDGHSSPNPFQHG.LSPIN      | 1364 |
| Coelacanth Scribble                         | SSPALNSPVKRDSPHSPTPQLASINFLSTHNDS...KSTKPGVIQPLSRVRPNMAPASQEGRDSPNPFQQP.EPESD        | 996  |
| Spotted gar Scribble                        | SSE.PMGLSPSKDALYSPSSQPASINFLSNAAPKEN..KSTKPGVIQPLSRLWQNAPPASQDQSSPSSFQRG.LPLTE       | 1357 |
| Chinese softshell turtle Scribble           | SDG.ASL....RLPLLSLSLQ.....LRPHA.....PPSPED.....VPNVN                                 | 1229 |
| Zebra finch Scribble                        | AAG.SMQDSMT...PRGPS.....PPSPSPDE.....VPINV                                           | 1251 |
| Medaka Scribble                             | STD.SPRTDSPIREAPYSPIIQPANIHYTSTPTTKDDLSSTRPGAIQPVGRVRQGTSPSTPDGH.SPNPFQHG.PSPFN      | 1346 |
| Yenyuan stream salamander Scribble isoform1 | SIN.FLSQSD.....SQS.....TKPGAIQPHSWVRQTVTPPSSEGRNSPNPFQQH.ENSSN                       | 75   |
| Yenyuan stream salamander Scribble isoform2 | SID.AVSGSHVKREAPYSPTTQQ.....TKPGAIQPHSWVRQTVTPPSSEGRNSPNPFQQH.ENSSN                  | 605  |
| Yenyuan stream salamander Scribble isoform3 | SID.AVSGSHVKREAPYSPTTQQ.....TKPGAIQPHSWVRQTVTPPSSEGRNSPNPFQQH.ENSSN                  | 276  |
| Yenyuan stream salamander Scribble isoform4 | SID.AVSGSHVKREAPYSPTTQQ.....TKPGAIQPHSWVRQTVTPPSSEGRNSPNPFQQH.ENSSN                  | 276  |
| Yenyuan stream salamander Scribble isoform5 | SID.AVSGSHVKREAPYSPTTQQ.....TKPGAIQPHSWVRQTVTPPSSEGRNSPNPFQQH.ENSSN                  | 605  |
| Yenyuan stream salamander Scribble isoform6 | SID.AVSGSHVKREAPYSPTTQQASINFLSQSDS....QSTKPGAIQPHSWVRQTVTPPSSEGRNSPNPFQQH.ENSSN      | 289  |
| Yenyuan stream salamander Scribble isoform7 | SID.AVSGSHVKREAPYSPTTQQASINFLSQSDS....QSTKPGAIQPHSWVRQTVTPPSSEGRNSPNPFQQH.ENSSN      | 289  |
| Yenyuan stream salamander Scribble isoform8 | SID.AVSGSHVKREAPYSPTTQQ.....                                                         | 61   |
| Yenyuan stream salamander Scribble isoform9 | SID.AVSGSHVKREAPYSPTTQQ.....TKPGAIQPHSWVRQTVTPPSSEGRNSPNPFQQH.ENSSN                  | 605  |

conservation

Asian Arowana Scribble

Cattle Scribble

Zebrafish Scribble

Coelacanth Scribble

Spotted gar Scribble

Chinese softshell turtle Scribble

Zebra finch Scribble

Medaka Scribble

Yenyuan stream salamander Scribble isoform1

Yenyuan stream salamander Scribble isoform2

Yenyuan stream salamander Scribble isoform3

Yenyuan stream salamander Scribble isoform4

Yenyuan stream salamander Scribble isoform5

Yenyuan stream salamander Scribble isoform6

Yenyuan stream salamander Scribble isoform7

Yenyuan stream salamander Scribble isoform8

Yenyuan stream salamander Scribble isoform9

1370

1380

1390

1400

1410

1420

1430

1440

PAYQPQAPSPRSPDDFPINIKQAYKAFAAVPPSLALLDPPQEPVSQ..RNNIQPR..SPVVEPELDNDVFESEMKANS

KQAY.....RTF.....AAVPLG..HPPLDTPA.....

SQTT.....DLYSP..RNNVSAKQPSPEFQPELNNEVFMDECDGEGS..

THST.....EPFIQ..KNTVRPK.....PEA.....

SHTS.....EPFVQTRKTNALPL..QP..SPEV.....

KQAY.....KTF.....AAVPQS..HSLLEPQM.....

KQAY.....KTF.....AAVPLS..QPLLGTQV.....

SQTS.....DLYGV..RNNFHHRQSSP.....ES.....

MHNSPGPSTPLSPDEFPVNVKQAYKTFAAVPVAAQIVLE.QQDVFIIP..RTPERPN..AP...SEV.....

MHNS.....DVFIIP..RTPERPN..AP...SEV.....

MHNS.....DVFIIP..RTPERPN..AP...SEV.....

MHNSPGPSTPLSPDEFPVNVKQAYKTFAAVPVAAQIVLE.QQDVFIIP..RTPERPN..AP...SEV.....

MHNS.....DVFIIP..RTPERPN..AP...SEV.....

MHNS.....DVFIIP..RTPERPN..AP...SEV.....

MHNS.....DVFIIP..RTPERPN..AP...SEV.....

MHNS.....DVFIIP..RTPERPN..AP...SEV.....

MHNS.....DVFIIP..RTPERPN..AP...SEV.....

1441

1323

1404

1015

1381

1250

1272

1368

132

626

297

333

626

310

310

78

626

conservation

Asian Arowana Scribble

Cattle Scribble

Zebrafish Scribble

Coelacanth Scribble

Spotted gar Scribble

Chinese softshell turtle Scribble

Zebra finch Scribble

Medaka Scribble

Yenyuan stream salamander Scribble isoform1

Yenyuan stream salamander Scribble isoform2

Yenyuan stream salamander Scribble isoform3

Yenyuan stream salamander Scribble isoform4

Yenyuan stream salamander Scribble isoform5

Yenyuan stream salamander Scribble isoform6

Yenyuan stream salamander Scribble isoform7

Yenyuan stream salamander Scribble isoform8

Yenyuan stream salamander Scribble isoform9

1450

1460

1470

1480

1490

1500

1510

1520

RAGAAPISSRRSFSSDRRDYLSLAAVPRLSRTSLELQSPASTGRGSPEQQRSFDRDRQKYFELDVKQQTPNTKPKPRVSLVG

.....QHPMLGPTASPEQLSFRERQKYFELEVRVPQAE..GPPKRVSLVG

.....GPRPSLLSDRSEYRSLAAVPRLSRPSVEPKTPSPFLGRHSPEQQRSFKDRQKYFELDVKQQTPD..KPKPRISLVG

.....SSPRGLDSPEQQRSFDRDRQKYFELDVKQQQAE..KPPKRVSLVG

.....PTSSGLESPEQQRSFDRDRQKYFELDMKQQTLDSKPKPRVSLVG

.....LSPPGGLHSPEQQRSFDRDRQKYFEMEVRKQQQVE..KPPKRVSLVG

.....AVHSPGGQHSPEQQRSFDRDRQKYFELVVKQQHLD..KPPKRVSLVG

.....PSPSGKDGPEQQRSFKDRQKYFELDVKQQTPD..KPKPRVSLVG

.....STPTGLDSPEQQRSFDRDRQKYFELDVKQQQLSE..KPPKRVSLVG

.....STPTGLDSPEQQRSFDRDRQKYFELDVKQQQLSE..KPPKRVSLVG

.....STPTGLDSPEQQRSFDRDRQKYFELDVKQQQLSE..KPPKRVSLVG

.....STPTGLDSPEQQRSFDRDRQKYFELDVKQQQLSE..KPPKRVSLVG

.....STPTGLDSPEQQRSFDRDRQKYFELDVKQQQLSE..KPPKRVSLVG

.....STPTGLDSPEQQRSFDRDRQKYFELDVKQQQLSE..KPPKRVSLVG

.....STPTGLDSPEQQRSFDRDRQKYFELDVKQQQLSE..KPPKRVSLVG

.....STPTGLDSPEQQRSFDRDRQKYFELDVKQQQLSE..KPPKRVSLVG

1521

1366

1476

1056

1423

1291

1315

1409

173

667

338

374

667

351

351

119

667

conservation

Asian Arowana Scribble

Cattle Scribble

Zebrafish Scribble

Coelacanth Scribble

Spotted gar Scribble

Chinese softshell turtle Scribble

Zebra finch Scribble

Medaka Scribble

Yenyuan stream salamander Scribble isoform1

Yenyuan stream salamander Scribble isoform2

Yenyuan stream salamander Scribble isoform3

Yenyuan stream salamander Scribble isoform4

Yenyuan stream salamander Scribble isoform5

Yenyuan stream salamander Scribble isoform6

Yenyuan stream salamander Scribble isoform7

Yenyuan stream salamander Scribble isoform8

Yenyuan stream salamander Scribble isoform9

1530

1540

1550

1560

1570

1580

1590

EDDLKKMKEEEARRIEGCAQDYLLDE..DEEDEEDLAKQMTEIKAQGVLLDGVVEYKIESVASQTSSSPRP..CVTPPSY

ADDLRKMQEEEARKLQKKRAQMLREAAAANTGLPEADAPEDEEPEEPPWAGQG.....PMA.....

EDDLKKMKEEEAKRIEQRAREFMLDE.DEDEEDEEDLAKQVAHMKAHGKVVLDDGVVEYKVESLGS....PTSRQCATPPNY

EDDLKKMKEEEARKLQKKAREVLLDEDEEDEDEEDVVKRMSDISSHGSVITIEGVVEYKVERVDGRGSRSPLT....GLNY

EDDLKKMKEEEVKRMEDIAQELLDE.EDDEEDEEDLAKQMAEMKAQGVVVIDGVVEYKIERVDGHSSTSPTTGYCTAKPVE

EDDLKKMKEEEARKLQKKRALLLEEE..DEEDEEDAGK..PDMSMQSSVITIEGVVEYKIKRLNGRSIQSPAT.....

EDDLKKMKEEEARKLQKKRALLLEEEAEEDDEERQVPEAMQAATA.....WQVSSRGPTASLSP.....

EDDLKKMREEEERKFQRRAREYLLDEDDDEEDEEDLAKQVAHMKASGKVLLDGVVEYKVEPISS....PSQHYNLTPQRY

EDDLKKMKEEEFKRLQKKRQMLLQEV..DEEDEEDVVKKMADLSSQSSIYIEGVVEYKIERIDGRSQSPVP.....

EDDLKKMKEEEFKRLQKKRQMLLQEV..DEEDEEDVVKKMADLSSQSSIYIEGVVEYKIERIDGRSQSPVP.....

EDDLKKMKEEEFKRLQKKRQMLLQEV..DEEDEEDVVKKMADLSSQSSIYIEGVVEYKIERIDGRSQSPVP.....

EDDLKKMKEEEFKRLQKKRQMLLQEV..DEEDEEDVVKKMADLSSQSSIYIEGVVEYKIERIDGRSQSPVP.....

EDDLKKMKEEEFKRLQKKRQMLLQEV..DEEDEEDVVKKMADLSSQSSIYIEGVVEYKIERIDGRSQSPVP.....

EDDLKKMKEEEFKRLQKKRQMLLQEV..DEEDEEDVVKKMADLSSQSSIYIEGVVEYKIERIDGRSQSPVP.....

EDDLKKMKEEEFKRLQKKRQMLLQEV..DEEDEEDVVKKMADLSSQSSIYIEGVVEYKIERIDGRSQSPVP.....

EDDLKKMKEEEFKRLQKKRQMLLQEV..DEEDEEDVVKKMADLSSQSSIYIEGVVEYKIERIDGRSQSPVP.....

1597

1422

1550

1131

1502

1358

1374

1484

242

736

407

443

736

420

420

188

736



*Yenyuan's stream salamander Scribble isoform9*

*Yenyuan's stream salamander Scribble isoform9*

*Yenyuan 'stream' salamander 'Scribble' isoform9*

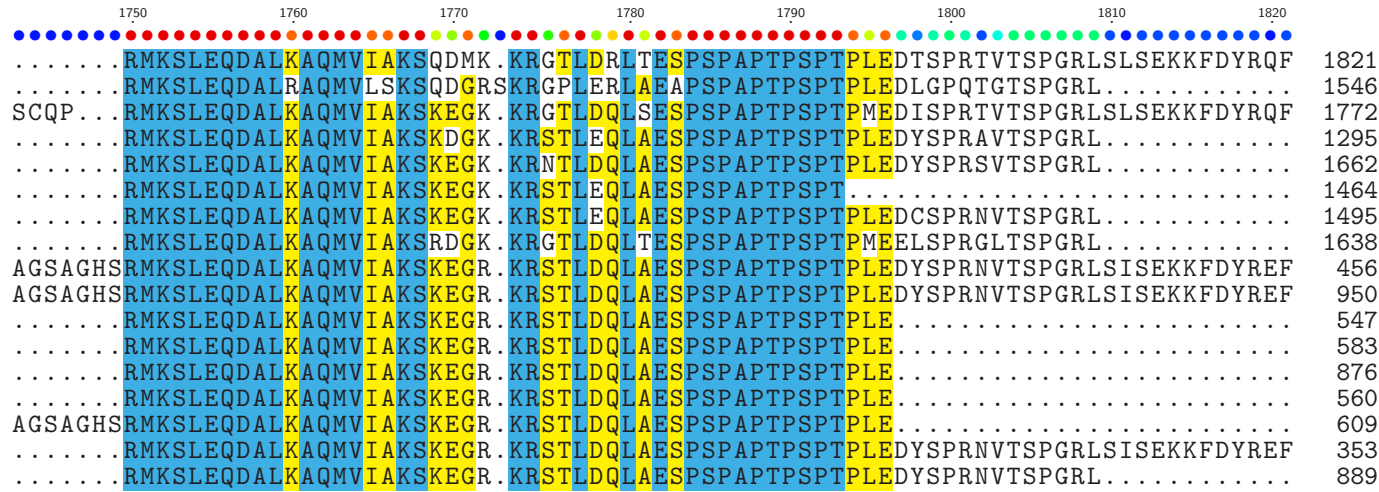

Supplement: s1 [file s1]
