# Supplementary figures and images for: The First Transcriptome Assembly of Yenyuan Stream Salamander (Batrachuperus yenyuanensis) Provides Novel Insights into Its Molecular Evolution
Source: MDPI journal article supplement (doi:10.3390/ijms20071529), 2019-03-27

Length distribution of unigenes with FPKM  $\geq 1$

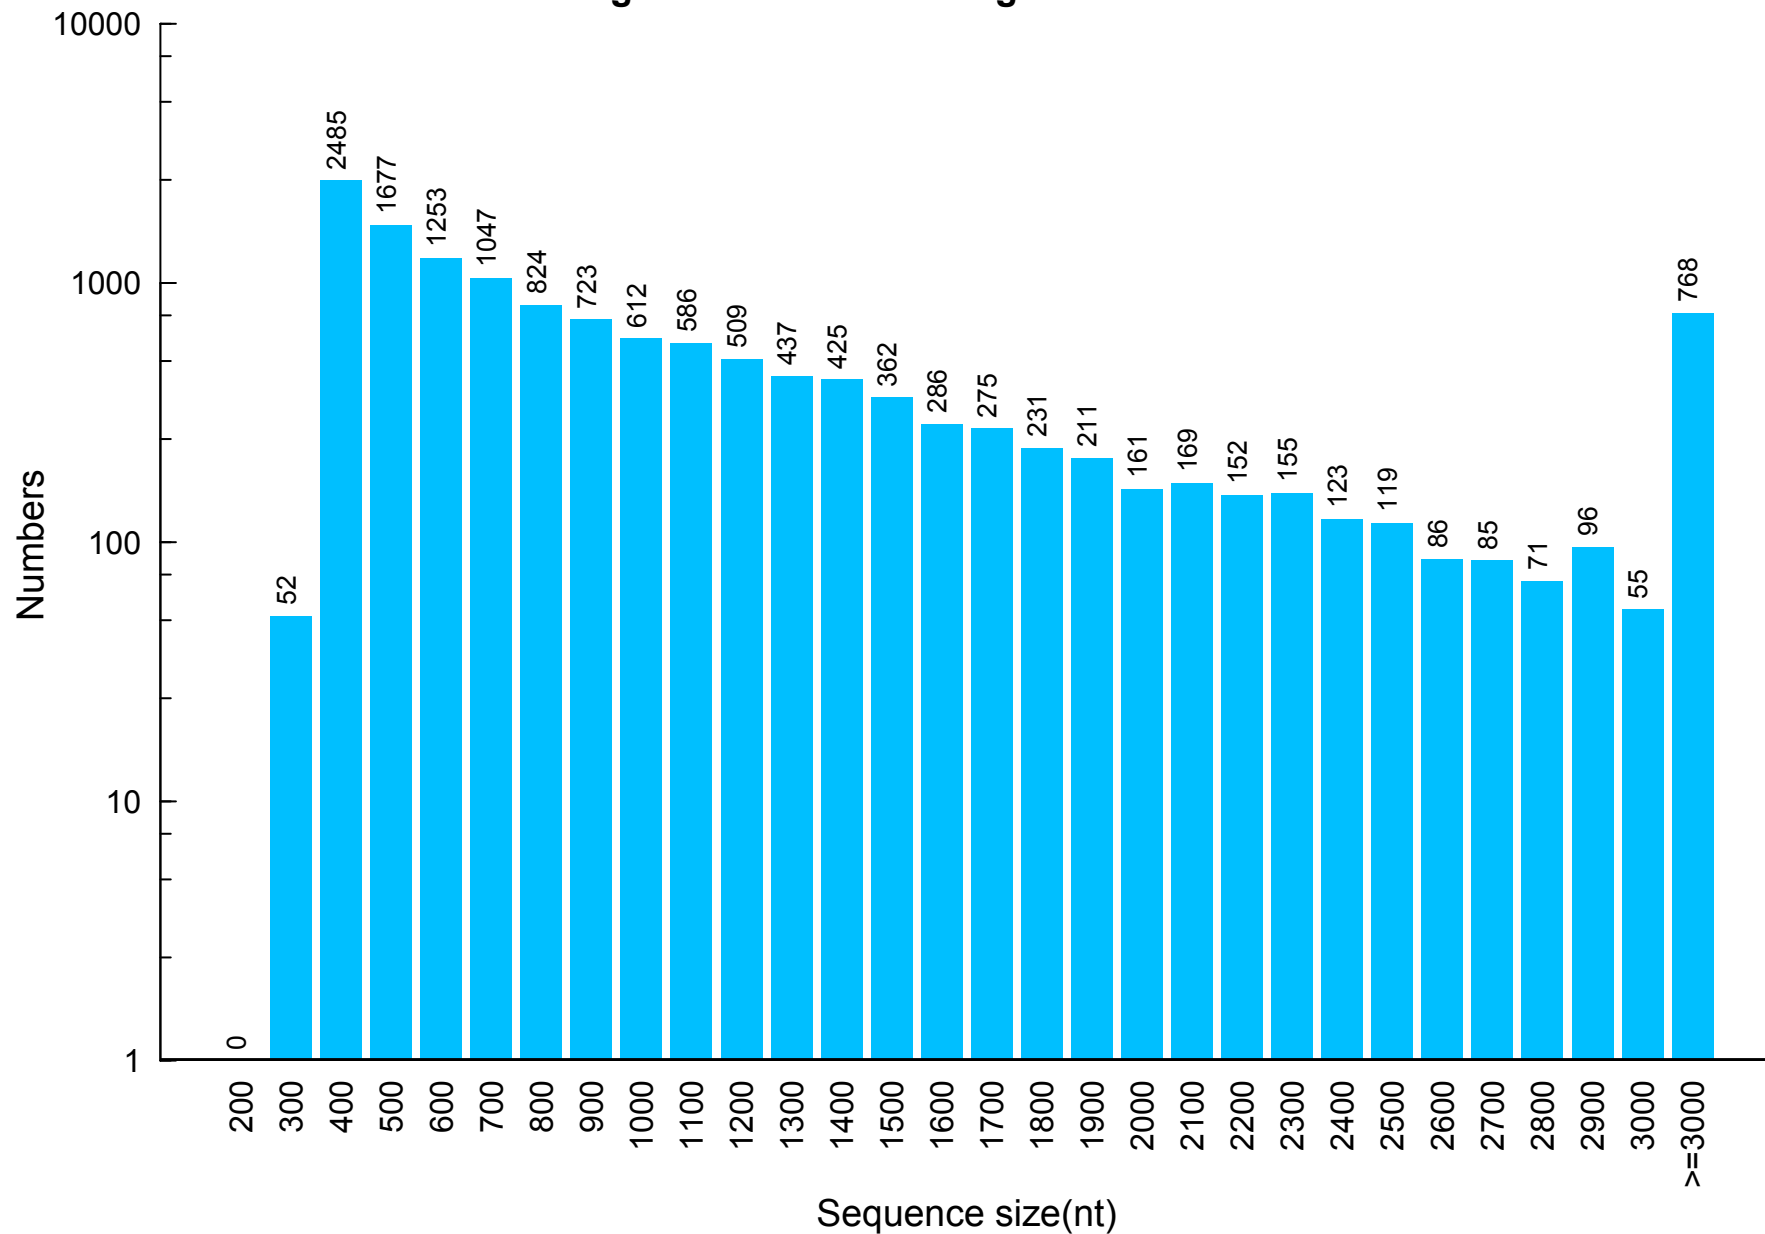

Supplement: s1 [file s1]

Length distribution of Unigenes

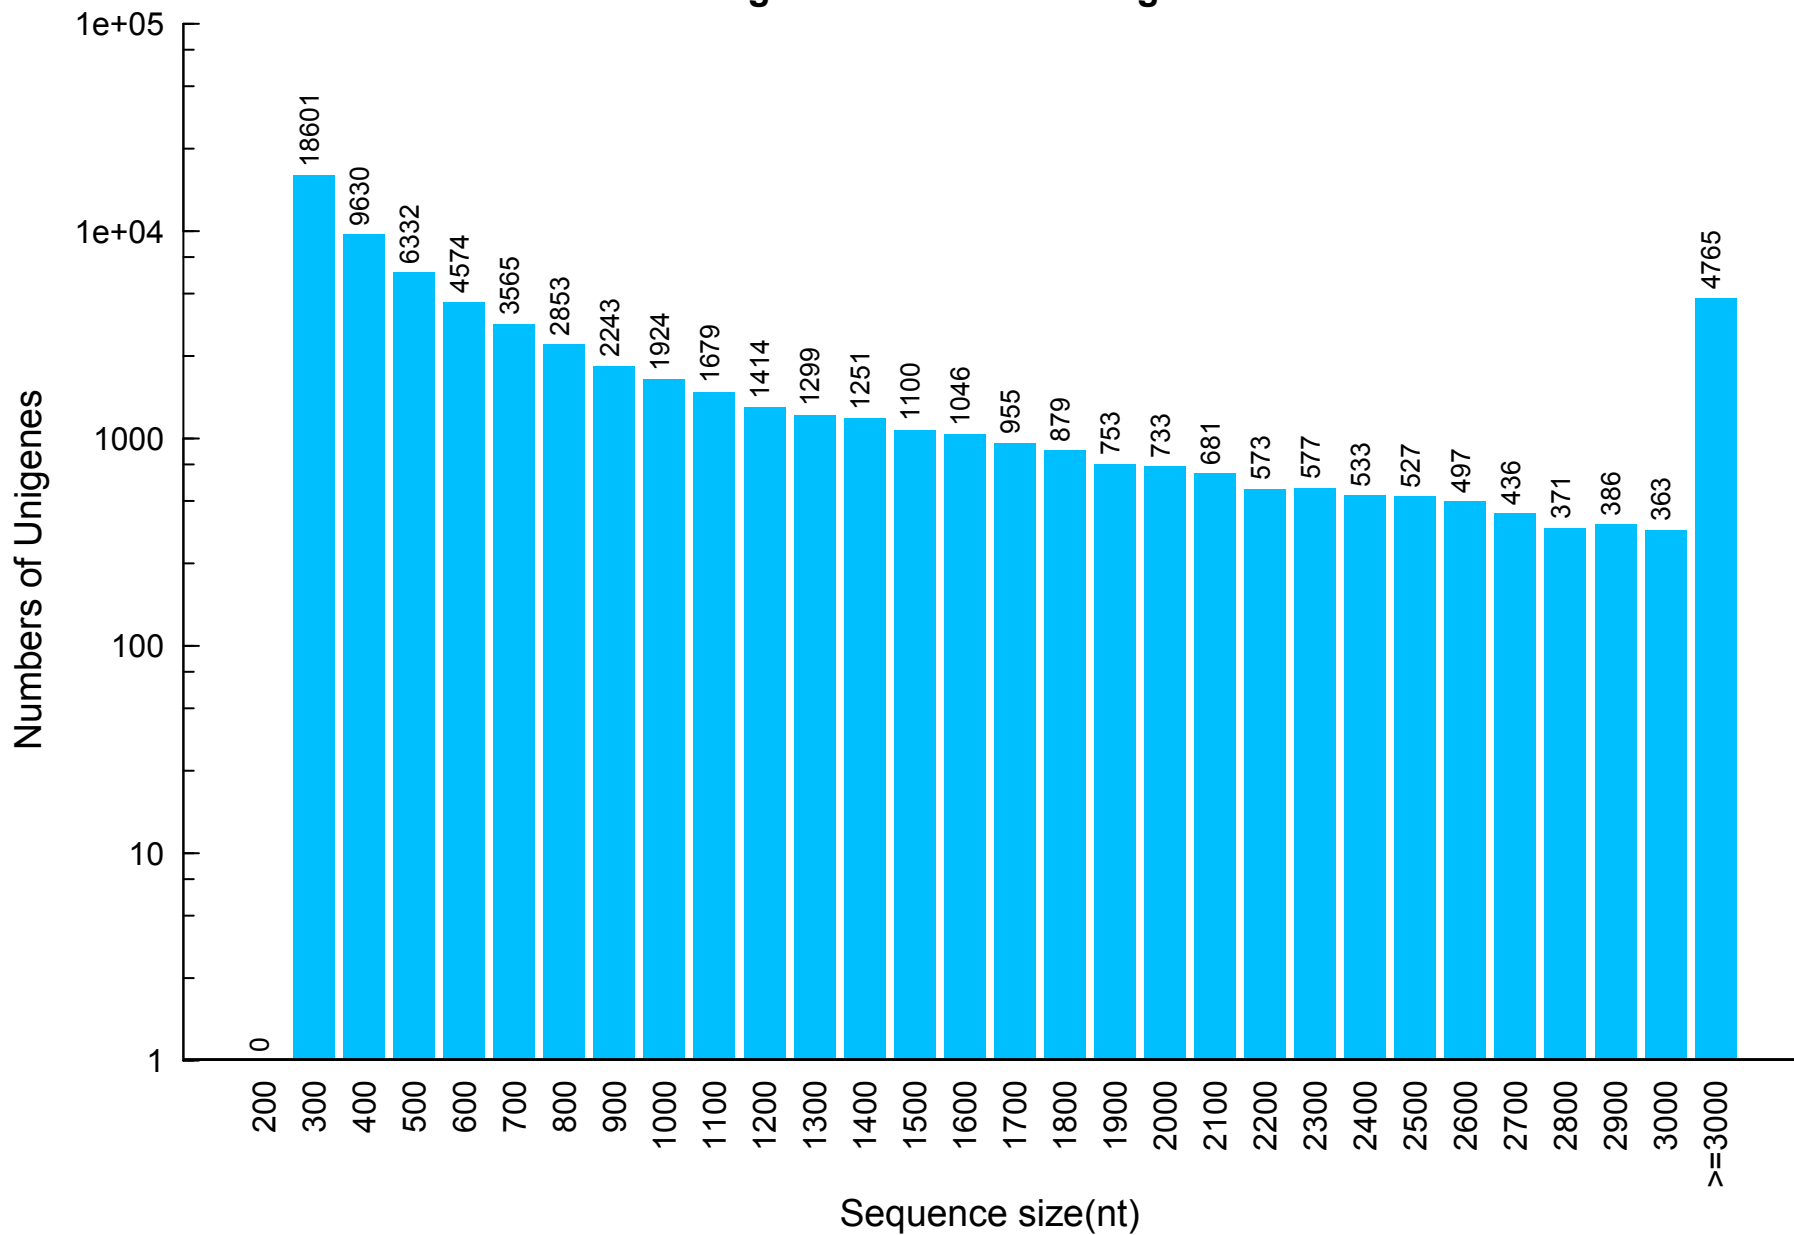

Supplement: s1 [file s1]

Length distributions of raw contigs assembled by Trinity

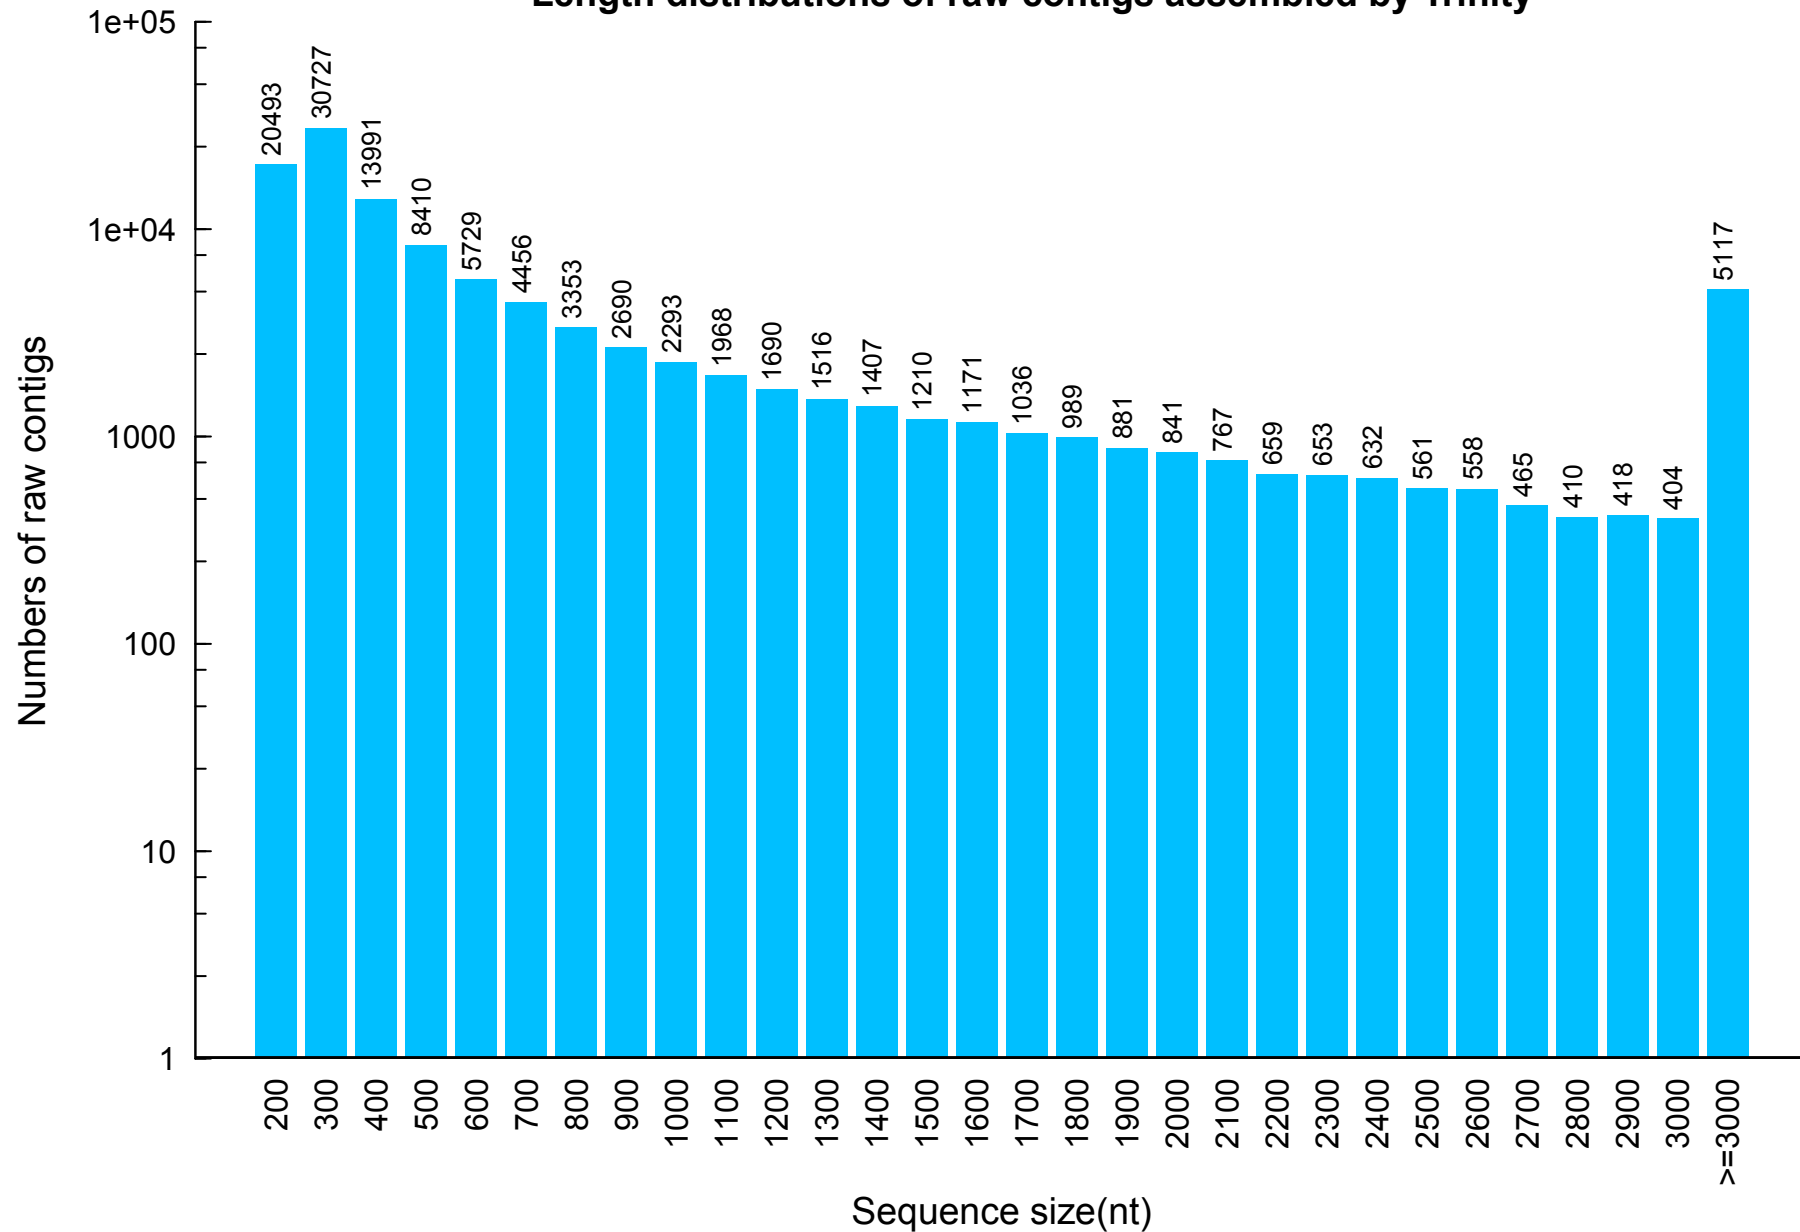

Supplement: s1 [file s1]
